# Supplementary material for: The Roles of Mitochondrion in Intergenomic Gene Transfer in Plants: A Source and a Pool
Source: MDPI journal article supplement (doi:10.3390/ijms19020547), 2018-02-11
Supplement: s1 [file s1]

| Categories                    |                                          | Genes        | B. rapa | B. napus | B. oleracea | A. thaliana | C. papaya | R. communis | G. max | V. radiata | S. latifolia | D. carota | N. tabacum | V. vinifera | S. polyphiza | P. dactylifera | O. sativa japonica | O. sativa indica | S. bicolor | Z. mays | A. trichopoda | M. polymorpha | P. putans |
|-------------------------------|------------------------------------------|--------------|---------|----------|-------------|-------------|-----------|-------------|--------|------------|--------------|-----------|------------|-------------|--------------|----------------|--------------------|------------------|------------|---------|---------------|---------------|-----------|
| Photosynthesis                | RuBisCO large subunit                    | <i>rbcL</i>  |         |          |             |             |           |             |        |            |              |           |            |             |              |                |                    |                  |            |         |               |               |           |
|                               | Photosystem I                            | <i>psaA</i>  |         |          |             |             |           |             |        |            |              |           |            |             |              |                |                    |                  |            |         |               |               |           |
|                               |                                          | <i>psaB</i>  |         |          |             |             |           |             |        |            |              |           |            |             |              |                |                    |                  |            |         |               |               |           |
|                               |                                          | <i>psaC</i>  |         |          |             |             |           |             |        |            |              |           |            |             |              |                |                    |                  |            |         |               |               |           |
|                               |                                          | <i>psaI</i>  |         |          |             |             |           |             |        |            |              |           |            |             |              |                |                    |                  |            |         |               |               |           |
|                               |                                          | <i>psaJ</i>  |         |          |             |             |           |             |        |            |              |           |            |             |              |                |                    |                  |            |         |               |               |           |
|                               | Assembly/stability of photosystem I      | <i>ycf3</i>  |         |          |             |             |           |             |        |            |              |           |            |             |              |                |                    |                  |            |         |               |               |           |
|                               |                                          | <i>ycf4</i>  |         |          |             |             |           |             |        |            |              |           |            |             |              |                |                    |                  |            |         |               |               |           |
|                               | Photosystem II                           | <i>psbA</i>  |         |          |             |             |           |             |        |            |              |           |            |             |              |                |                    |                  |            |         |               |               |           |
|                               |                                          | <i>psbB</i>  |         |          |             |             |           |             |        |            |              |           |            |             |              |                |                    |                  |            |         |               |               |           |
|                               |                                          | <i>psbC</i>  |         |          |             |             |           |             |        |            |              |           |            |             |              |                |                    |                  |            |         |               |               |           |
|                               |                                          | <i>psbD</i>  |         |          |             |             |           |             |        |            |              |           |            |             |              |                |                    |                  |            |         |               |               |           |
|                               |                                          | <i>psbE</i>  |         |          |             |             |           |             |        |            |              |           |            |             |              |                |                    |                  |            |         |               |               |           |
|                               |                                          | <i>psbF</i>  |         |          |             |             |           |             |        |            |              |           |            |             |              |                |                    |                  |            |         |               |               |           |
|                               |                                          | <i>psbH</i>  |         |          |             |             |           |             |        |            |              |           |            |             |              |                |                    |                  |            |         |               |               |           |
|                               |                                          | <i>psbI</i>  |         |          |             |             |           |             |        |            |              |           |            |             |              |                |                    |                  |            |         |               |               |           |
|                               |                                          | <i>psbJ</i>  |         |          |             |             |           |             |        |            |              |           |            |             |              |                |                    |                  |            |         |               |               |           |
|                               |                                          | <i>psbK</i>  |         |          |             |             |           |             |        |            |              |           |            |             |              |                |                    |                  |            |         |               |               |           |
|                               |                                          | <i>psbL</i>  |         |          |             |             |           |             |        |            |              |           |            |             |              |                |                    |                  |            |         |               |               |           |
|                               |                                          | <i>psbM</i>  |         |          |             |             |           |             |        |            |              |           |            |             |              |                |                    |                  |            |         |               |               |           |
|                               |                                          | <i>psbN</i>  |         |          |             |             |           |             |        |            |              |           |            |             |              |                |                    |                  |            |         |               |               |           |
|                               |                                          | <i>psbT</i>  |         |          |             |             |           |             |        |            |              |           |            |             |              |                |                    |                  |            |         |               |               |           |
|                               |                                          | <i>psbZ</i>  |         |          |             |             |           |             |        |            |              |           |            |             |              |                |                    |                  |            |         |               |               |           |
|                               | Cytochrome b/f complex                   | <i>petA</i>  |         |          |             |             |           |             |        |            |              |           |            |             |              |                |                    |                  |            |         |               |               |           |
|                               |                                          | <i>petB</i>  |         |          |             |             |           |             |        |            |              |           |            |             |              |                |                    |                  |            |         |               |               |           |
|                               |                                          | <i>petD</i>  |         |          |             |             |           |             |        |            |              |           |            |             |              |                |                    |                  |            |         |               |               |           |
|                               |                                          | <i>petG</i>  |         |          |             |             |           |             |        |            |              |           |            |             |              |                |                    |                  |            |         |               |               |           |
|                               |                                          | <i>petL</i>  |         |          |             |             |           |             |        |            |              |           |            |             |              |                |                    |                  |            |         |               |               |           |
|                               |                                          | <i>petN</i>  |         |          |             |             |           |             |        |            |              |           |            |             |              |                |                    |                  |            |         |               |               |           |
|                               | c-type cytochrome                        | <i>ccsA</i>  |         |          |             |             |           |             |        |            |              |           |            |             |              |                |                    |                  |            |         |               |               |           |
|                               | ATP synthase                             | <i>atpA</i>  |         |          |             |             |           |             |        |            |              |           |            |             |              |                |                    |                  |            |         |               |               |           |
|                               |                                          | <i>atpB</i>  |         |          |             |             |           |             |        |            |              |           |            |             |              |                |                    |                  |            |         |               |               |           |
|                               |                                          | <i>atpE</i>  |         |          |             |             |           |             |        |            |              |           |            |             |              |                |                    |                  |            |         |               |               |           |
|                               |                                          | <i>atpF</i>  |         |          |             |             |           |             |        |            |              |           |            |             |              |                |                    |                  |            |         |               |               |           |
|                               |                                          | <i>atpH</i>  |         |          |             |             |           |             |        |            |              |           |            |             |              |                |                    |                  |            |         |               |               |           |
|                               |                                          | <i>atpI</i>  |         |          |             |             |           |             |        |            |              |           |            |             |              |                |                    |                  |            |         |               |               |           |
|                               | NADH dehydrogenase                       | <i>ndhA</i>  |         |          |             |             |           |             |        |            |              |           |            |             |              |                |                    |                  |            |         |               |               |           |
|                               |                                          | <i>ndhB</i>  |         |          |             |             |           |             |        |            |              |           |            |             |              |                |                    |                  |            |         |               |               |           |
|                               |                                          | <i>ndhC</i>  |         |          |             |             |           |             |        |            |              |           |            |             |              |                |                    |                  |            |         |               |               |           |
|                               |                                          | <i>ndhD</i>  |         |          |             |             |           |             |        |            |              |           |            |             |              |                |                    |                  |            |         |               |               |           |
|                               |                                          | <i>ndhE</i>  |         |          |             |             |           |             |        |            |              |           |            |             |              |                |                    |                  |            |         |               |               |           |
|                               |                                          | <i>ndhF</i>  |         |          |             |             |           |             |        |            |              |           |            |             |              |                |                    |                  |            |         |               |               |           |
|                               |                                          | <i>ndhG</i>  |         |          |             |             |           |             |        |            |              |           |            |             |              |                |                    |                  |            |         |               |               |           |
|                               |                                          | <i>ndhH</i>  |         |          |             |             |           |             |        |            |              |           |            |             |              |                |                    |                  |            |         |               |               |           |
|                               |                                          | <i>ndhI</i>  |         |          |             |             |           |             |        |            |              |           |            |             |              |                |                    |                  |            |         |               |               |           |
|                               |                                          | <i>ndhJ</i>  |         |          |             |             |           |             |        |            |              |           |            |             |              |                |                    |                  |            |         |               |               |           |
| Transcription and translation | RNA polymerase                           | <i>rpoA</i>  |         |          |             |             |           |             |        |            |              |           |            |             |              |                |                    |                  |            |         |               |               |           |
|                               |                                          | <i>rpoB</i>  |         |          |             |             |           |             |        |            |              |           |            |             |              |                |                    |                  |            |         |               |               |           |
|                               |                                          | <i>rpoC1</i> |         |          |             |             |           |             |        |            |              |           |            |             |              |                |                    |                  |            |         |               |               |           |
|                               |                                          | <i>rpoC2</i> |         |          |             |             |           |             |        |            |              |           |            |             |              |                |                    |                  |            |         |               |               |           |
|                               | Ribosomal proteins (Large subunit, LSU)  | <i>rpl2</i>  |         |          |             |             |           |             |        |            |              |           |            |             |              |                |                    |                  |            |         |               |               |           |
|                               |                                          | <i>rpl12</i> |         |          |             |             |           |             |        |            |              |           |            |             |              |                |                    |                  |            |         |               |               |           |
|                               |                                          | <i>rpl14</i> |         |          |             |             |           |             |        |            |              |           |            |             |              |                |                    |                  |            |         |               |               |           |
|                               |                                          | <i>rpl16</i> |         |          |             |             |           |             |        |            |              |           |            |             |              |                |                    |                  |            |         |               |               |           |
|                               |                                          | <i>rpl20</i> |         |          |             |             |           |             |        |            |              |           |            |             |              |                |                    |                  |            |         |               |               |           |
|                               |                                          | <i>rpl22</i> |         |          |             |             |           |             |        |            |              |           |            |             |              |                |                    |                  |            |         |               |               |           |
|                               |                                          | <i>rpl23</i> |         |          |             |             |           |             |        |            |              |           |            |             |              |                |                    |                  |            |         |               |               |           |
|                               |                                          | <i>rpl32</i> |         |          |             |             |           |             |        |            |              |           |            |             |              |                |                    |                  |            |         |               |               |           |
|                               | Ribosomal proteins, (Small subunit, SSU) | <i>rpl33</i> |         |          |             |             |           |             |        |            |              |           |            |             |              |                |                    |                  |            |         |               |               |           |
|                               |                                          | <i>rpl36</i> |         |          |             |             |           |             |        |            |              |           |            |             |              |                |                    |                  |            |         |               |               |           |
|                               |                                          | <i>rps2</i>  |         |          |             |             |           |             |        |            |              |           |            |             |              |                |                    |                  |            |         |               |               |           |
|                               |                                          | <i>rps3</i>  |         |          |             |             |           |             |        |            |              |           |            |             |              |                |                    |                  |            |         |               |               |           |
|                               |                                          | <i>rps4</i>  |         |          |             |             |           |             |        |            |              |           |            |             |              |                |                    |                  |            |         |               |               |           |
|                               |                                          | <i>rps7</i>  |         |          |             |             |           |             |        |            |              |           |            |             |              |                |                    |                  |            |         |               |               |           |
|                               |                                          | <i>rps8</i>  |         |          |             |             |           |             |        |            |              |           |            |             |              |                |                    |                  |            |         |               |               |           |
|                               |                                          | <i>rps11</i> |         |          |             |             |           |             |        |            |              |           |            |             |              |                |                    |                  |            |         |               |               |           |
|                               |                                          | <i>rps12</i> |         |          |             |             |           |             |        |            |              |           |            |             |              |                |                    |                  |            |         |               |               |           |
|                               |                                          | <i>rps14</i> |         |          |             |             |           |             |        |            |              |           |            |             |              |                |                    |                  |            |         |               |               |           |
|                               |                                          | <i>rps15</i> |         |          |             |             |           |             |        |            |              |           |            |             |              |                |                    |                  |            |         |               |               |           |
|                               |                                          | <i>rps16</i> |         |          |             |             |           |             |        |            |              |           |            |             |              |                |                    |                  |            |         |               |               |           |
|                               |                                          | <i>rps18</i> |         |          |             |             |           |             |        |            |              |           |            |             |              |                |                    |                  |            |         |               |               |           |
|                               |                                          | <i>rps19</i> |         |          |             |             |           |             |        |            |              |           |            |             |              |                |                    |                  |            |         |               |               |           |
| Others                        | Maturase                                 | <i>matK</i>  |         |          |             |             |           |             |        |            |              |           |            |             |              |                |                    |                  |            |         |               |               |           |
|                               | Acetyl-CoA carboxylase subunit           | <i>accD</i>  |         |          |             |             |           |             |        |            |              |           |            |             |              |                |                    |                  |            |         |               |               |           |
|                               | Inorganic carbon uptake                  | <i>cemA</i>  |         |          |             |             |           |             |        |            |              |           |            |             |              |                |                    |                  |            |         |               |               |           |
|                               | ATP-dependent protease subunit           | <i>clpP</i>  |         |          |             |             |           |             |        |            |              |           |            |             |              |                |                    |                  |            |         |               |               |           |
|                               | Conserved reading frames ( <i>ycf</i> s) | <i>ycf1</i>  |         |          |             |             |           |             |        |            |              |           |            |             |              |                |                    |                  |            |         |               |               |           |
|                               |                                          | <i>ycf2</i>  |         |          |             |             |           |             |        |            |              |           |            |             |              |                |                    |                  |            |         |               |               |           |

■ Intact chloroplast homologs in the nuclear genome  
■ Chloroplast-like pseudogenes in the nuclear genome  
■ No chloroplast homologs in the nuclear genome  
■ Genes losing in the chloroplast genome

**Figure S1.** Genes identified to transfer in and out of the chloroplast genome or genes lost from the chloroplast genome of 21 land plants. The first three columns are mitochondrial protein-encoding genes (the third column) and their functional categories (the first two columns). The first line lists the names of plant species. The red and green cells represent chloroplast full-length intact homologs and pseudogenes in nuclear genomes, respectively. The white and yellow cells represent no chloroplast homologs in nuclear genomes and genes lost from chloroplast genomes, respectively.
