# Supplementary material for: The Roles of Mitochondrion in Intergenomic Gene Transfer in Plants: A Source and a Pool
Source: MDPI journal article supplement (doi:10.3390/ijms19020547), 2018-02-11
Supplement: s1 [file s1]

| A | 2bp microhomology                                                                  |                           | blunt-end DNA joining |       |
|---|------------------------------------------------------------------------------------|---------------------------|-----------------------|-------|
|   | mtDNA                                                                              | cpDNA                     | cpDNA                 | mtDNA |
|   |  |                           |                       |       |
|   | AAGAAATAAA                                                                         | <i>Z. mays</i>            | GAAAGAAGAG            |       |
|   | TGCAGGGCAA                                                                         | <i>Z. luxurians</i>       | GAAAGAAGAG            |       |
|   | TGCAGGGCAA                                                                         | <i>T. aestivum</i>        | AGAGCAAAAT            |       |
|   | TGCAGGGCAA                                                                         | <i>S. bicolor</i>         | CTTTATCGTA            |       |
|   | ATCAATTCAA                                                                         | <i>O. sativa indica</i>   | ATTATTGTTCG           |       |
|   | ATCAATTCAA                                                                         | <i>O. sativa japonica</i> | ATTATTGTTCG           |       |

| B | blunt-end DNA joining                                                              |                           | blunt-end DNA joining |       |
|---|------------------------------------------------------------------------------------|---------------------------|-----------------------|-------|
|   | mtDNA                                                                              | cpDNA                     | cpDNA                 | mtDNA |
|   |  |                           |                       |       |
|   | TACAAGTACG                                                                         | <i>Z. mays</i>            | CTAGAATAAT            |       |
|   | TACAAGTACG                                                                         | <i>Z. luxurians</i>       | AGGGTCAAAA            |       |
|   | TACTAAGTCC                                                                         | <i>T. aestivum</i>        | CGAACAATGA            |       |
|   | GACTTTTTTC                                                                         | <i>S. bicolor</i>         | TCTCTCCCCC            |       |
|   | AGTCCCTTTA                                                                         | <i>O. sativa indica</i>   | AGAGAAGGGT            |       |
|   | AGTCCCTTTA                                                                         | <i>O. sativa japonica</i> | AGAGAAGGGT            |       |

**Figure S4.** Nucleotide-resolution analysis on flanking sequences of chloroplast-derived *trnC* and *trnF* genes in mitochondrial genomes of most *Gramineae* crops. Red color indicates nucleotide sequence micro-homologies. cpDNA and mtDNA are the abbreviations of chloroplast DNA and mitochondrial DNA, respectively. The yellow-green-yellow strip represents the fusion sequence of mtDNA-cpDNA-mtDNA. The sequences under the two yellow strips on the left and right are the flanking sequences of inserted chloroplast-like tRNA gene in the mitochondrial genomes. The red capital English letters close to cpDNA indicate the nucleotides of micro-homologies among the different species.
