# Supplementary material for: The Roles of Mitochondrion in Intergenomic Gene Transfer in Plants: A Source and a Pool
Source: MDPI journal article supplement (doi:10.3390/ijms19020547), 2018-02-11
Supplement: s1 [file s1]

**Table S2.** Total length (bp) of nuclear-transferred sequences in mitochondrial genomes of 23 plants.

| Species        |                           | Copia                    | Gypsy                     | Low complexity | LTR-retro                 | Simple repeat | TE    | Un-specified | Total length       |
|----------------|---------------------------|--------------------------|---------------------------|----------------|---------------------------|---------------|-------|--------------|--------------------|
| Spermatophytes | <b>Eudicots</b>           |                          |                           |                |                           |               |       |              |                    |
|                | <i>B. rapa</i>            | 3,157                    | 2,288                     | 136            | <b>5,039<sup>1</sup></b>  | 550           | 1,650 | 428          | 13,248             |
|                | <i>B. napus</i>           | 428                      | 2,288                     | 30             | <b>5,137<sup>1</sup></b>  | 657           | 1,588 | 428          | 10,556             |
|                | <i>B. oleracea</i>        | 6,416                    | 3,583                     | 342            | 8,799 <sup>1</sup>        | 731           | 3,004 | 797          | 23,672             |
|                | <i>A. thaliana</i>        | <b>8,422<sup>1</sup></b> | 6,206                     | 217            | 3,606                     | 1,140         | 1,792 | 369          | 21,752             |
|                | <i>C. papaya</i>          | 2,804                    | 3,586                     | 350            | 15,279 <sup>1</sup>       | 1,490         | 2,008 | 309          | 25,826             |
|                | <i>R. communis</i>        | 1,416                    | <b>7,543<sup>1</sup></b>  | 333            | 2,943                     | 1,814         | 2,104 | 616          | 16,769             |
|                | <i>G. max</i>             | 1,300                    | 3,798                     | 195            | <b>5,926<sup>1</sup></b>  | 849           | 1,889 | 620          | 14,577             |
|                | <i>V. radiata</i>         | 1,063                    | <b>4,181<sup>1</sup></b>  | 3,195          | 456                       | 738           | 1,927 | 649          | 12,209             |
|                | <i>S. latifolia</i>       | <b>2,787<sup>1</sup></b> | n.a. <sup>2</sup>         | 418            | 1,280                     | 2,110         | 996   | 369          | 7,960              |
|                | <i>D. carota</i>          | 844                      | <b>6,431<sup>1</sup></b>  | 168            | 4,640                     | 690           | 2,375 | 1,006        | 16,154             |
|                | <i>N. tabacum</i>         | 3,227                    | 2,953                     | 402            | <b>9,730<sup>1</sup></b>  | 999           | 4,421 | 1,404        | 23,136             |
|                | <i>V. vinifera</i>        | 2,047                    | <b>13,502<sup>1</sup></b> | 1,024          | 8,953                     | 4,102         | 5,802 | 693          | 36,123             |
|                | <b>Monocots</b>           |                          |                           |                |                           |               |       |              |                    |
|                | <i>S. polyrhiza</i>       | 480                      | <b>4,697<sup>1</sup></b>  | 113            | 3,274                     | 869           | 1,354 | 504          | 11,291             |
|                | <i>P. dactylifera</i>     | 4,818                    | 5,517                     | 950            | <b>10,058<sup>1</sup></b> | 3,737         | 2,698 | 575          | 28,353             |
|                | <i>O. sativa japonica</i> | 3,557                    | 5,461                     | 554            | <b>6,804<sup>1</sup></b>  | 1,201         | 3,118 | 738          | 21,433             |
|                | <i>O. sativa indica</i>   | 4,509                    | 4,921                     | 588            | 6,824 <sup>1</sup>        | 1,245         | 3,134 | 738          | 21,959             |
|                | <i>T. aestivum</i>        | 4,180                    | <b>8,755<sup>1</sup></b>  | 372            | 8,460                     | 1,061         | 2,188 | 738          | 25,754             |
|                | <i>S. bicolor</i>         | 2,145                    | 2,486                     | 324            | <b>5,484<sup>1</sup></b>  | 1,473         | 1,874 | 369          | 14,155             |
|                | <i>Z. luxurians</i>       | <b>4,053<sup>1</sup></b> | 436                       | 504            | 3,683                     | 2,732         | 1,797 | 2,639        | 15,844             |
|                | <i>Z. mays</i>            | 2,035                    | <b>10,303<sup>1</sup></b> | 370            | 5,613                     | 2,950         | 1,634 | 952          | 23,857             |
|                | <b>Gymnosperms</b>        |                          |                           |                |                           |               |       |              |                    |
|                | <i>C. taitungensis</i>    | 2,889                    | 588                       | 78             | <b>3,800<sup>1</sup></b>  | 2,664         | 1,182 | 369          | 11,570             |
| Bryophytes     |                           |                          |                           |                |                           |               |       |              |                    |
|                | <i>M. polymorpha</i>      | 228                      | 650                       | 133            | <b>1,381<sup>1</sup></b>  | 1,082         | 971   | 369          | 4,814              |
|                | <i>P. patens</i>          | 208                      | 613                       | 186            | 1,477 <sup>1</sup>        | 456           | 817   | 492          | 4,249 <sup>4</sup> |

<sup>1</sup> Bold notes the maximum of 7 repeats in each plant species. LTR-retro: long terminal repeat retrotransposons; TE: transposable element.
