# Supplementary material for: The Roles of Mitochondrion in Intergenomic Gene Transfer in Plants: A Source and a Pool
Source: MDPI journal article supplement (doi:10.3390/ijms19020547), 2018-02-11
Supplement: s1 [file s1]

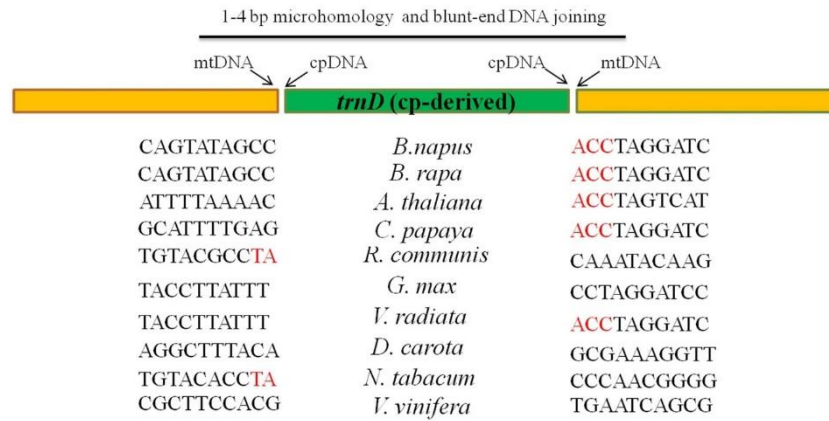

**Figure S3.** Nucleotide-resolution analysis on flanking sequences of the chloroplast-derived *trnD* gene in mitochondrial genomes of most eudicots. Red color indicates nucleotide sequence micro-homologies. cpDNA and mtDNA are the abbreviations of chloroplast DNA and mitochondrial DNA, respectively. The yellow-green-yellow strip represents the fusion sequence of mtDNA-cpDNA-mtDNA. The sequences under the two yellow strips on the left and right are the flanking sequences of inserted chloroplast-like tRNA gene in the mitochondrial genomes. The red capital English letters close to cpDNA indicate the nucleotides of micro-homologies among the different species.
