# Supplementary material for: The Roles of Mitochondrion in Intergenomic Gene Transfer in Plants: A Source and a Pool
Source: MDPI journal article supplement (doi:10.3390/ijms19020547), 2018-02-11
Supplement: s1 [file s1]

Table S3. The list of the full names of the analyzed genes and appropriate abbreviations.

| Organelles    | Category                                                          | Genes                                                                                                                         |
|---------------|-------------------------------------------------------------------|-------------------------------------------------------------------------------------------------------------------------------|
| Mitochondrion | <b>Respiration chain complexes</b>                                |                                                                                                                               |
|               | Complex I (Nicotinamide adenine dinucleotide dehydrogenase, NADH) | <i>nad1, nad2, nad3, nad4, nad4L, nad5, nad6, nad7, nad9</i>                                                                  |
|               | Complex II (Succinate dehydrogenase, SDH)                         | <i>sdh3, sdh4</i>                                                                                                             |
|               | Complex III (Cytochrome b)                                        | <i>cob</i>                                                                                                                    |
|               | Complex IV (Cytochrome c oxidase)                                 | <i>cox1, cox2, cox3</i>                                                                                                       |
|               | Complex V (ATP synthase)                                          | <i>atp1, atp4, atp6, atp8,</i>                                                                                                |
|               | Cytochrome c biogenesis                                           | <i>ccmB, ccmC, ccmFC, ccmFN</i>                                                                                               |
|               | <b>Translation</b>                                                |                                                                                                                               |
|               | Ribosomal proteins (Large subunit, LSU)                           | <i>rpl2, rpl5, rpl6, rpl10, rpl16</i>                                                                                         |
|               | Ribosomal proteins (Small subunit, SSU)                           | <i>rps1, rps2, rps3, rps4, rps7, rps10, rps11, rps12, rps13, rps14, rps19</i>                                                 |
|               | <b>Others</b>                                                     |                                                                                                                               |
|               | Intron maturase                                                   | <i>matR, mttB</i>                                                                                                             |
| Chloroplast   | <b>Photosynthesis</b>                                             |                                                                                                                               |
|               | RuBisCO large subunit                                             | <i>rbcL</i>                                                                                                                   |
|               | Photosystem I                                                     | <i>psaA, psaB, psaC, psaI, psaJ</i>                                                                                           |
|               | Assembly/stability of photosystem I                               | <i>ycf3, ycf4</i>                                                                                                             |
|               | Photosystem II                                                    | <i>psbA, psbB, psbC, psbD, psbE, psbF, psbH, psbI, psbJ, psbK, psbL, psbM, psbN, psbT, psbZ</i>                               |
|               | Cytochrome b/f complex                                            | <i>petA, petB, petD, petG, petL, petN</i>                                                                                     |
|               | C-type cytochrome                                                 | <i>ccsA</i>                                                                                                                   |
|               | ATP synthase                                                      | <i>atpA, atpB, atpE, atpF, atpH, atpI</i>                                                                                     |
|               | Nicotinamide adenine dinucleotide dehydrogenase (NADH)            | <i>ndhA, ndhB, ndhC, ndhD, ndhE, ndhF, ndhG, ndhH, ndhI, ndhJ, ndhK</i>                                                       |
|               | <b>Transcription and translation</b>                              |                                                                                                                               |
|               | Ribonucleic acid (RNA ) polymerase                                | <i>rpoA, rpoB, rpoC1, rpoC2</i>                                                                                               |
|               | Ribosomal protein (Large subunit, LSU)                            | <i>rpl2, rpl14, rpl16, rpl20, rpl22, rpl23, rpl32, rpl33, rpl36</i>                                                           |
|               | Ribosomal proteins (Small subunit, SSU)                           | <i>rps2, rps3, rps4, rps7, rps8, rps11, rps12, rps14, rps15, rps16, rps18, rps19</i>                                          |
|               | Transfer ribonucleic acid (tRNA)                                  | <i>trnA, trnC, trnD, trnE, trnF, trnG, trnH, trnI, trnK, trnL, trnM, trnN, trnP, trnQ, trnR, trnS, trnT, trnV, trnW, trnY</i> |
|               | <b>Others</b>                                                     |                                                                                                                               |
|               | Maturase                                                          | <i>matK</i>                                                                                                                   |
|               | Acetyl-CoA carboxylase subunit                                    | <i>accD</i>                                                                                                                   |
|               | Inorganic carbon uptake                                           | <i>cemA</i>                                                                                                                   |
|               | ATP-dependent protease subunit                                    | <i>clpP</i>                                                                                                                   |
|               | Conserved reading frames (ycfs)                                   | <i>ycf1, ycf2</i>                                                                                                             |
