# Supplementary material for: The Roles of Mitochondrion in Intergenomic Gene Transfer in Plants: A Source and a Pool
Source: MDPI journal article supplement (doi:10.3390/ijms19020547), 2018-02-11
Supplement: s1 [file s1]

**Table S1.** Accession numbers for nuclear, mitochondrial and chloroplast genomes of 24 plants species used in present research.

| Species                                                    | Nuclear genome<br>Accession No. | Mitochondrial genome<br>Accession No. | Chloroplast genome<br>Accession No. |
|------------------------------------------------------------|---------------------------------|---------------------------------------|-------------------------------------|
| <b>Spermatophytes</b>                                      |                                 |                                       |                                     |
| <b>Eudicots</b>                                            |                                 |                                       |                                     |
| <i>Brassica rapa</i> ( <i>B. rapa</i> )                    | AENI00000000                    | JF920285                              | DQ231548                            |
| <i>Brassica napus</i> ( <i>B. napus</i> )                  | PRJNA293435                     | AP006444                              | GQ861354                            |
| <i>Brassica oleracea</i> ( <i>B. oleracea</i> )            | AOIX00000000                    | JF920286                              | n.a. <sup>1</sup>                   |
| <i>Arabidopsis thaliana</i> ( <i>A. thaliana</i> )         | PRJNA10719                      | Y08501                                | AP000423                            |
| <i>Carica papaya</i> ( <i>C. papaya</i> )                  | ABIM00000000                    | EU431224                              | EU431223                            |
| <i>Ricinus communis</i> ( <i>R. communis</i> )             | AASG02000000                    | HQ874649                              | JF937588                            |
| <i>Glycine max</i> ( <i>G. max</i> )                       | ACUP00000000                    | JX463295                              | DQ317523                            |
| <i>Vigna radiate</i> ( <i>V. radiata</i> )                 | PRJNA301363                     | HM367685                              | GQ893027                            |
| <i>Silene latifolia</i> ( <i>S. latifolia</i> )            | PRJNA289891                     | HM562727                              | JF715055                            |
| <i>Daucus carota</i> ( <i>D. carota</i> )                  | PRJNA326436                     | JQ248574                              | DQ898156                            |
| <i>Nicotiana tabacum</i> ( <i>N. tabacum</i> )             | PRJNA170566                     | BA000042                              | Z00044                              |
| <i>Vitis vinifera</i> ( <i>V. vinifera</i> )               | PRJEA18785                      | FM179380                              | DQ424856                            |
| <b>Monocots</b>                                            |                                 |                                       |                                     |
| <i>Spirodela polyrhiza</i> ( <i>S. polyrhiza</i> )         | PRJNA205940                     | JQ804980                              | JN160603                            |
| <i>Phoenix dactylifera</i> ( <i>P. dactylifera</i> )       | PRJNA249070                     | JN375330                              | GU811709                            |
| <i>Oryza sativa Japonica</i> ( <i>O. sativa japonica</i> ) | PRJNA12269                      | BA000029                              | X15901                              |
| <i>Oryza sativa indica</i> ( <i>O. sativa indica</i> )     | PRJNA361                        | DQ167399                              | AY522329                            |
| <i>Triticum aestivum</i> ( <i>T. aestivum</i> )            | PRJEB11773                      | AP008982                              | AB042240                            |
| <i>Sorghum bicolor</i> ( <i>S. bicolor</i> )               | PRJNA13876                      | DQ984518                              | EF115542                            |
| <i>Zea luxurians</i> ( <i>Z. luxurians</i> )               | n.a. <sup>1</sup>               | DQ645537                              | KR873424                            |
| <i>Zea mays</i> ( <i>Z. mays</i> )                         | PRJNA10769                      | AY506529                              | X86563                              |
| <b>Basal Angiosperms</b>                                   |                                 |                                       |                                     |
| <i>Amborella trichopoda</i> ( <i>A. trichopoda</i> )       | PRJNA212863                     | KF754799-KF754803                     | AJ506156                            |
| <b>Gymnosperms</b>                                         |                                 |                                       |                                     |
| <i>Cycas taitungensis</i> ( <i>C. taitungensis</i> )       | n.a. <sup>1</sup>               | AP009381                              | AP009339                            |
| <b>Bryophytes</b>                                          |                                 |                                       |                                     |
| <i>Marchantia polymorpha</i> ( <i>M. polymorpha</i> )      | PRJNA310693                     | M68929                                | X04465                              |
| <i>Physcomitrella patens</i> ( <i>P. patens</i> )          | ABEU01000000                    | AB251495                              | AP005672                            |

<sup>1</sup> “n. a.” notes the genome not released yet.
