# Supplementary material for: The Roles of Mitochondrion in Intergenomic Gene Transfer in Plants: A Source and a Pool
Source: MDPI journal article supplement (doi:10.3390/ijms19020547), 2018-02-11
Supplement: s1 [file s1]

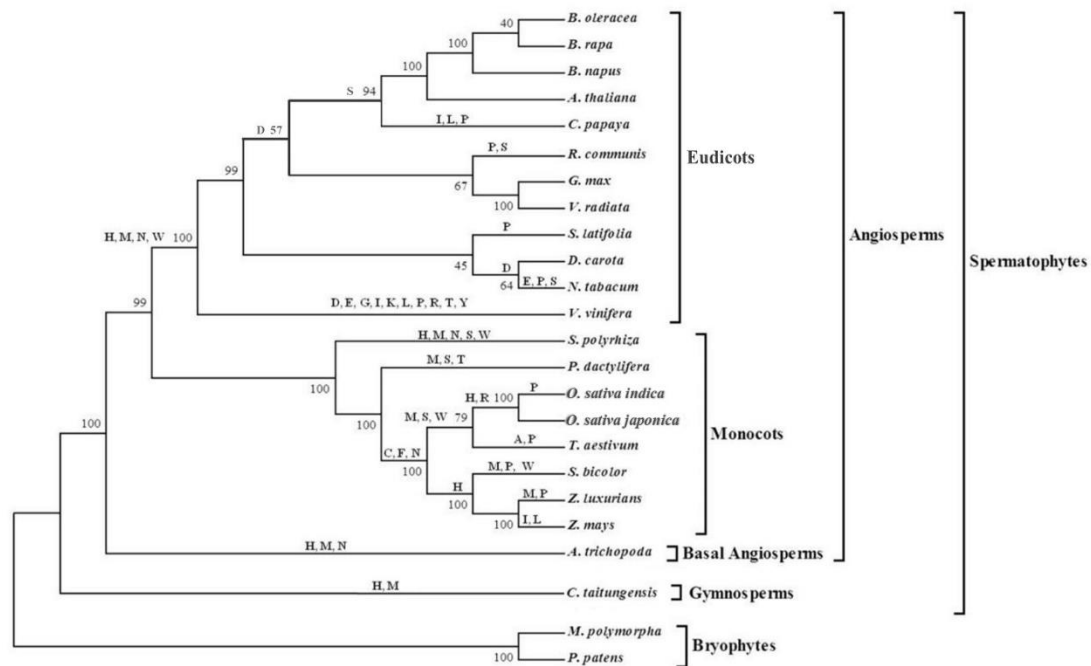

**Figure S2.** Phylogenetic analysis of chloroplast-derived tRNA genes losing and transferring to the mitochondrion in land plants. The capital letters at the nodes and the branches denote the corresponding amino acids encoded by chloroplast-like tRNA genes in mitochondrial genomes. A: Alanine; C: Cysteine; D: Aspartic acid; E: Glutamic acid; F: Phenylalanine; G: Glicine; H: Histidine; I: Isoleucine; K: Lysine; L: Leucine; M: Methionine; N: Asparagine; P: Proline; Q: Glutamine; R: Arginine; S: Serine; T: Threonine; V: Valine; W: Tryptophan; Y: Tyrosine. The number at the nodes represent bootstrap values. The phylogenetic tree is constructed by the maximum likelihood (ML) method with the model GTR + G + I.
